# Supplementary material for: CdS nanobelt-based self-powered flexible photodetectors with high photosensitivity
Source: Royal Society of Chemistry journal article supplement (doi:10.1039/d1ma00580d), 2021-01-01
Supplement: d1ma00580d1.pdf [file d1ma00580d1.pdf]

## Electronic Supplementary Information (ESI)

### CdS Nanobelt Based Self-powered Flexible Photodetectors with High Photosensitivity

Muhammad Zubair Nawaz, Liu Xu, Xing Zhou, Khizar Hussain Shah, Jiale Wang, Binhe Wu,  
Chunrui Wang\*

College of Science and Shanghai Institute of Intelligent Electronics and Systems, Donghua University, 2999  
Renmin Rd North, Songjiang District, Shanghai 201620, P. R. China

E-mail: [crwang@dhu.edu.cn](mailto:crwang@dhu.edu.cn)

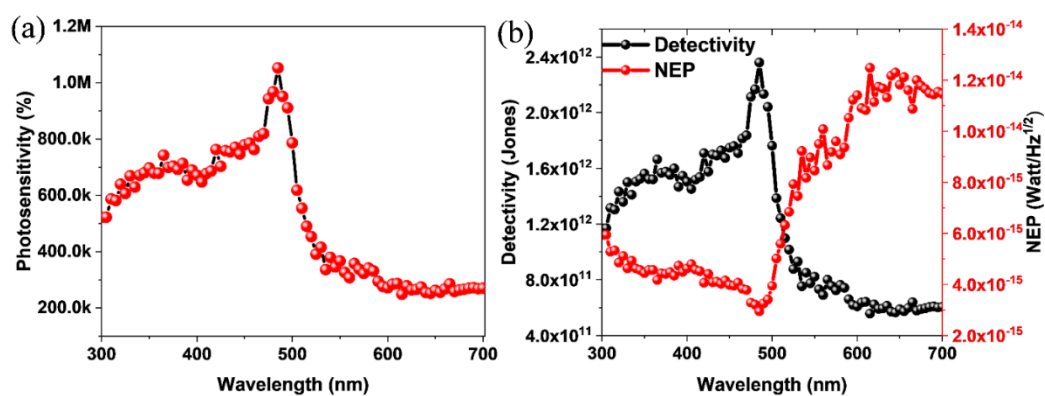

**Figure S1.** (a) Photosensitivity of CdS nanobelt device measured in the wavelength range of 300 to 700 nm with fixed light intensity of  $215 \mu\text{W}/\text{cm}^2$ . (b)  $D^*$  and NEP plots of CdS nanobelt photodetector as a function of wavelength.

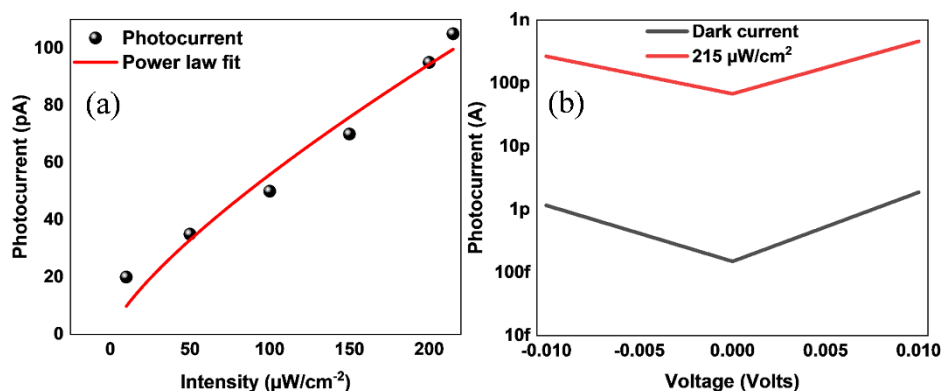

**Figure S2.** (a) Photocurrent reliance on light power density at bias of 0 V. The obtained fitting value of  $\theta$  is 0.95 ( $I \sim P^{0.95}$ ). (b) Corresponding semi-logarithmic I-V plot of FSPD from Figure 5b.

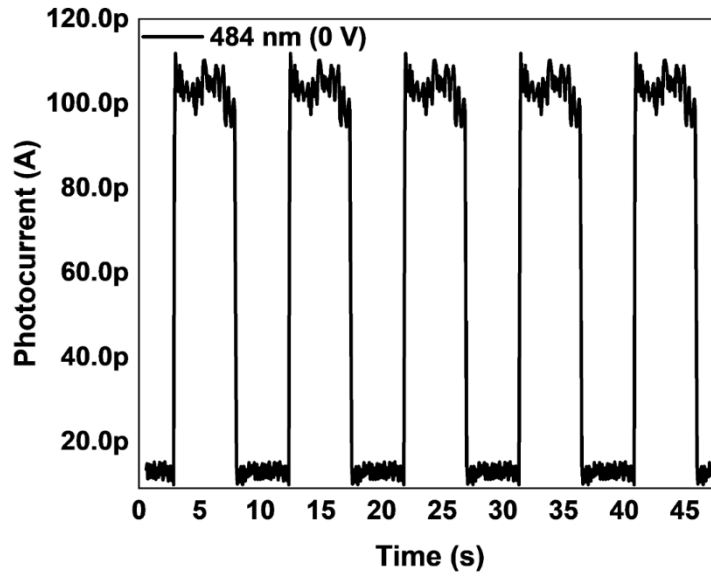

**Figure S3.** Photoswitching photocurrent of the photodetector at zero bias under 484 nm illumination with a fixed light intensity of  $215 \mu\text{W}/\text{cm}^2$ .

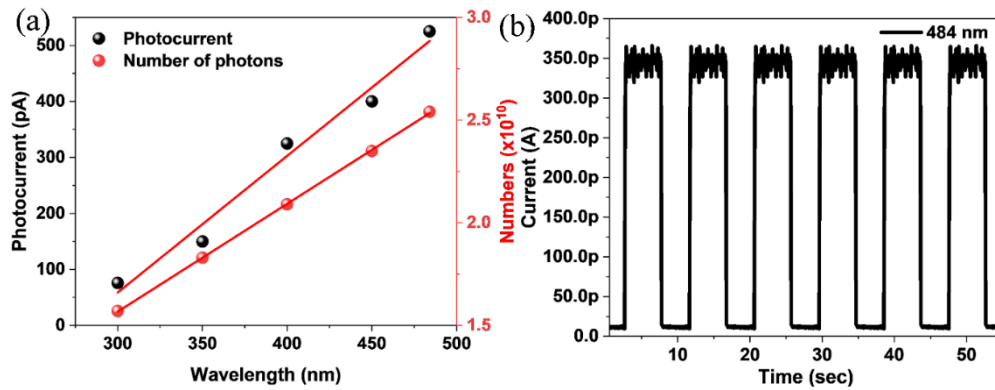

**Figure S4.** (a) Photocurrent and number of photons of the device over varied wavelength of light and the linear correlation coefficient ( $R^2$ ) of the curve is 0.99. The number of photons with different wavelengths was obtained according to the formula  $P.S=N.h.c/\lambda$ , where  $P$ ,  $S$ ,  $N$ ,  $h$ ,  $c$  and  $\lambda$  are the light power density, the effective area under irradiation, the number of incident photons, Planck's constant, the velocity of light, and the wavelength of illuminated light, respectively [1]. (b) Photoswitching photocurrent of the flexible device at low bias under 484 nm illumination with a fixed light intensity of  $215 \mu\text{W}/\text{cm}^2$ . When turn on the illumination, photocurrent rises and the  $\tau_r$  is less than 80 ms. When turn off the illumination, the photocurrent drops to zero nearly, and the  $\tau_f$  is less than 50 ms.

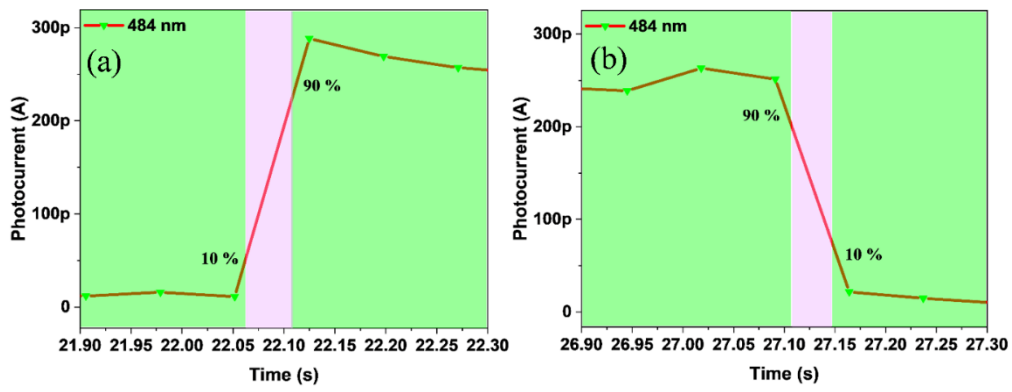

**Figure S5.** corresponding rise and fall time obtained from selected cycle from Figure 4b. The rise and fall time were found ~40 ms and 30 ms, respectively.

### References

- [1] G. Li, L. Liu, G. Wu, W. Chen, S. Qin, Y. Wang, T. Zhang, Self-Powered UV-Near Infrared Photodetector Based on Reduced Graphene Oxide/n-Si Vertical Heterojunction, *Small* 12 (2016) 5019-5026.
